# Supplementary material for: Evaluation of the Antioxidant and Anti-Lipoxygenase Activity of Berberis vulgaris L. Leaves, Fruits, and Stem and Their LC MS/MS Polyphenolic Profile
Source: MDPI journal article supplement (doi:10.3390/antiox12071467), 2023-07-21
Supplement: s1 [file s1]

**Table S1.** Summary of optimized QTRAP parameters for the LC-MS analysis of phenolic acids and flavonoid compounds. Abbreviations: Q1/Q3 – m/z values for precursor and fragment ion detected in Q1 and Q3 quadrupole, respectively (tracked MRM transitions); declustering potential (DP); entrance potential (EP); collision cell exit potential (CEP); collision energy (CE).

| Compound                                          | Retention<br>time<br>[min] | Q1/Q3<br>[m/z] | DP<br>[V] | EP<br>[V] | CEP<br>[V] | CE<br>[eV] |
|---------------------------------------------------|----------------------------|----------------|-----------|-----------|------------|------------|
| Phenolic acids                                    |                            |                |           |           |            |            |
| Gallic acid                                       | 5.16                       | 168.7/78.9     | -35       | -3        | -12        | -36        |
|                                                   |                            | 168.7/124.9    | -35       | -3        | -12        | -14        |
| 3-Caffeoylquinic acid                             | 6.93                       | 352.9/191.1    | -25       | -10       | -24.7      | -28        |
|                                                   |                            | 352.9/178.9    | -25       | -10       | -24.7      | -22        |
| Protocatechuic acid                               | 8.42                       | 152.9/80.9     | -55       | -1        | -10        | -26        |
|                                                   |                            | 152.9/107.8    | -55       | -1        | -10        | -38        |
| 5-Caffeoylquinic acid                             | 9.24                       | 353.0/190.9    | -35       | -4.5      | -16        | -20        |
|                                                   |                            | 353.0/85       | -35       | -4.5      | -16        | -60        |
| 4-Caffeoylquinic acid                             | 9.38                       | 352.9/173      |           |           | -24.7      | -21        |
|                                                   |                            | 352.9/135      | -25       | -10       | -24.7      | -36        |
|                                                   |                            | 352.9/179      | -25       | -10       | -24.7      | -22        |
| 4-Hydroxybenzoic acid                             | 10.84                      | 136.8/92.9     | -30       | -7        | -10        | -18        |
| Gentisic acid                                     | 11.37                      | 152.8/80       | -70       | -4        | -16        | -110       |
|                                                   |                            | 152.8/96.9     | -70       | -4        | -16        | -52        |
| Caffeic acid                                      | 11.38                      | 178.7/88.9     | -30       | -6.5      | -12        | -46        |
|                                                   |                            | 178.7/134.9    | -30       | -6.5      | -12        | -16        |
| Vanillic acid                                     | 11.41                      | 166.8/107.9    | -35       | -4        | -12        | -18        |
|                                                   |                            | 166.8/123      | -35       | -4        | -12        | -12        |
| Syringic acid                                     | 11.42                      | 196.9/122.8    | -30       | -9        | -12        | -24        |
|                                                   |                            | 196.9/181.9    | -30       | -9        | -12        | -12        |
| 3-Hydroxybenzoic acid                             | 12.12                      | 136.8/93       | -35       | -4        | -16.7      | -16        |
|                                                   |                            | 136.8/75       | -35       | -4        | -16.7      | -48        |
| 4-Hydroxycinnamic acid ( <i>p</i> -coumaric acid) | 14.10                      | 162.7/119      | -30       | -8        | -12        | -14        |
|                                                   |                            | 162.7/93       | -30       | -8        | -12        | -44        |
| Sinapic acid                                      | 14.47                      | 222.8/121      | -35       | -8.5      | -10        | -36        |
|                                                   | 14.94                      | 222.8/148.9    | -35       | -8.5      | -10        | -20        |
| Ferulic acid                                      | 14.80                      | 192.8/133.9    | -25       | -11.5     | -14        | -16        |
|                                                   | 15.22                      | 192.8/177.9    | -25       | -11.5     | -14        | -12        |
| 3-Hydroxycinnamic acid ( <i>m</i> -coumaric acid) | 15.50                      | 162.7/119      | -35       | -4.5      | -12        | -14        |
|                                                   |                            | 162.7/91       | -35       | -4.5      | -12        | -36        |
| Rosmarinic acid                                   | 15.91                      | 358.7/160.8    | -50       | -5        | -26        | -20        |
|                                                   |                            | 358.7/196.8    | -50       | -5        | -26        | -22        |
| 2-Hydroxycinnamic acid ( <i>o</i> -coumaric acid) | 16.80                      | 162.7/119      | -25       | -5        | -10        | -14        |
|                                                   |                            | 162.7/93       | -25       | -5        | -10        | -46        |
| Salicylic acid                                    | 17.91                      | 136.8/93       | -35       | -4        | -10        | -16        |
|                                                   |                            | 136.8/75       | -35       | -4        | -10        | -48        |
| Flavonoid aglycones                               |                            |                |           |           |            |            |
| Catechin                                          | 9.64                       | 288.8/244.9    | -45       | -4.5      | -16        | -16        |
|                                                   |                            | 288.8/109      | -45       | -4.5      | -16        | -32        |

|                                         |       |              |     |       |       |     |
|-----------------------------------------|-------|--------------|-----|-------|-------|-----|
| Epigallocatechin gallate                | 11.20 | 457/169.1    | -25 | -10   | -28.6 | -30 |
|                                         |       | 457/125      | -25 | -10   | -28.6 | -30 |
| Dihydromyricetin                        | 12.10 | 319/193      | -25 | -10   | -23.5 | -30 |
|                                         |       | 319/125      | -25 | 10    | -23.5 | -30 |
| Naringenin                              | 14.52 | 270.8/119    | -50 | -11.5 | -12   | -34 |
|                                         |       | 270.8/150.9  | -50 | -11.5 | -12   | -22 |
| Taxifolin                               | 15.15 | 302.7/124.9  | -45 | -3.5  | -18   | -26 |
|                                         |       | 302.7/284.8  | -45 | -3.5  | -18   | -14 |
| Myricetin                               | 16.57 | 316.7/136.9  | -55 | -9    | -14   | -32 |
|                                         |       | 316.7/150.9  | -55 | -9    | -14   | -26 |
| Luteolin                                | 17.82 | 284.7/132.9  | -75 | -9    | -18   | -38 |
|                                         |       | 284.7/150.9  | -75 | -9    | -18   | -26 |
| Eriodictiol                             | 17.89 | 286.7/134.9  | -45 | -6    | -12   | -32 |
|                                         |       | 286.7/150.9  | -45 | -6    | -12   | -18 |
| Laricitrin                              | 17.9  | 330.97/151   | -25 | -10   | -23.9 | -30 |
| (3'-O-Methylmyricetin)                  |       | 330.97/315.9 | -25 | 10    | -23.9 | -30 |
| Quercetin                               | 17.94 | 300.7/150.9  | -60 | -2.5  | -12   | -26 |
|                                         |       | 300.7/178.8  | -60 | -2.5  | -12   | -20 |
| 3-O-Methylquercetin                     | 18.11 | 314.7/299.8  | -55 | -9.5  | -22   | -18 |
|                                         |       | 314.7/270.8  | -55 | -9.5  | -22   | -26 |
| Apigenin                                | 18.64 | 268.8/117    | -70 | -9.5  | -12   | -44 |
|                                         |       | 268.8/106.8  | -70 | -9.5  | -12   | -34 |
| Kaempferol                              | 18.85 | 284.7/116.8  | -70 | -5    | -12   | -46 |
|                                         |       | 284.7/93     | -70 | -5    | -12   | -52 |
| Isorhamnetin                            | 18.99 | 314.7/299.7  | -65 | -2.5  | -26   | -20 |
|                                         |       | 314.7/150.9  | -65 | -2.5  | -26   | -30 |
| Isokaempferide                          | 19.16 | 298.8/283.9  | -50 | -4.5  | -12   | -18 |
|                                         |       | 298.8/226.9  | -50 | -4.5  | -12   | -28 |
| Rhamnetin                               | 20.10 | 314.7/165    | -60 | -5.5  | -18   | -24 |
|                                         |       | 314.7/120.9  | -60 | -5.5  | -18   | -36 |
| Sakuranetin                             | 21.67 | 284.7/118.9  | -60 | -5.5  | -12   | -34 |
|                                         |       | 284.7/164.8  | -60 | -5.5  | -12   | -20 |
| Chrysin                                 | 21.82 | 252.8/208.9  | -80 | -10   | -14   | -22 |
|                                         |       | 252.8/142.9  | -80 | -10   | -14   | -26 |
| Prunetin                                | 21.98 | 282.8/267.7  | -55 | -12   | -18   | -20 |
|                                         |       | 282.8/238.7  | -55 | -12   | -18   | -26 |
| Rhamnazin                               | 22.37 | 328.7/270.8  | -70 | -3    | -28   | -26 |
|                                         |       | 328.7/313.8  | -70 | -3    | -28   | -14 |
| Flavonoid glycosides                    |       |              |     |       |       |     |
| Eleutheroside E                         | 10.38 | 740.8/416.9  | -60 | -3.5  | -54   | -36 |
|                                         |       | 740.8/578.9  | -60 | -3.5  | -54   | -14 |
| Luteolin 3',7'-diglucoside              | 11.28 | 609.1/285    | -70 | -7.5  | -28   | -50 |
|                                         |       | 609.1/447    | -70 | -7.5  | -28   | -32 |
| Quercetin 3,7-dirhamnoside              | 11.35 | 592.8/445.7  | -90 | -4    | -26   | -48 |
|                                         |       | 592.8/298.9  | -90 | -4    | -26   | -34 |
| Eriodictyol-7-O-rutinoside (Eriocitrin) | 11.93 | 594.8/286.9  | -75 | -4.5  | -28   | -34 |
|                                         |       | 594.8/150.9  | -75 | -4.5  | -28   | -46 |
| Quercetin-3-O-rutinoside (Rutin)        | 11.99 | 608.7/299.6  | -90 | -8    | -30   | -46 |
|                                         |       | 608.7/270.9  | -90 | -8    | -30   | -60 |

|                                                      |       |                            |            |                |                |            |
|------------------------------------------------------|-------|----------------------------|------------|----------------|----------------|------------|
| Kempferol 3,7-dirhamnoside<br>(Kaempferitrin)        | 12.16 | 576.8/284.8<br>576.8/430.9 | -80<br>-80 | -4.5<br>-4.5   | -28<br>-28     | -42<br>-30 |
| Apigenin – 6-C-glucoside<br>(Isovitexin)             | 12.38 | 430.8/310.9<br>430.8/340.9 | -65<br>-65 | -4.5<br>-4.5   | -18<br>-18     | -28<br>-26 |
| Apigenin – 8-C-glucoside<br>(Vitexin)                | 12.40 | 430.8/310.9<br>430.8/340.9 | -75<br>-75 | -4.5<br>-4.5   | -20<br>-20     | -26<br>-34 |
| Quercetin-3-O-galactoside<br>(Hyperoside)            | 12.80 | 462.7/299.7<br>462.7/254.7 | -70<br>-70 | -4<br>-4       | -18<br>-18     | -28<br>-42 |
| Luteolin-7-O-glucoside<br>(Luteoloside)              | 12.87 | 446.8/284.8<br>446.8/132.9 | -70<br>-70 | -10.5<br>-10.5 | -20<br>-20     | -30<br>-78 |
| Quercetin-3-O-glucoside<br>(Isoquercetin)            | 13.00 | 462.7/299.7<br>462.7/270.7 | -85<br>-85 | -1.5<br>-1.5   | -20<br>-20     | -30<br>-44 |
| Eriodictyol-7-O-<br>glucopyranoside                  | 13.06 | 448.8/286.9<br>448.8/134.9 | -75<br>-75 | -4.5<br>-4.5   | -20<br>-20     | -24<br>-48 |
| Kaempferol – 3-O-rutinoside<br>(Nicotiflorin)        | 13.31 | 592.7/284.8<br>592.7/226.7 | -65<br>-65 | -12<br>-12     | -30<br>-30     | -38<br>-68 |
| Isorhamnetin-3-O-rutinoside<br>(Narcissoside)        | 13.52 | 622.8/314.9<br>622.8/298.8 | -90<br>-90 | -4.5<br>-4.5   | -30<br>-30     | -40<br>-52 |
| Naringenin-7-O-rutinoside<br>(Narirutin)             | 13.80 | 578.9/270.8<br>578.9/118.9 | -90<br>-90 | -4.5<br>-4.5   | -24<br>-24     | -34<br>-76 |
| Naringenin-7-O-<br>rhamnosidoglucoside<br>(Naringin) | 14.50 | 579.1/151<br>579.1/271     | -80<br>-80 | -4<br>-4       | -26<br>-26     | -54<br>-42 |
| Kaempferol – 3-O-glucoside<br>(Astragalin)           | 14.66 | 446.7/226.8<br>446.7/254.8 | -75<br>-75 | -9<br>-9       | -20<br>-20     | -54<br>-40 |
| Isorhamnetin-3-glucoside                             | 14.76 | 476.8/313.9<br>476.8/270.9 | -95<br>-95 | -10<br>-10     | -22<br>-22     | -30<br>-44 |
| Quercetin 3-O-rhamnoside<br>(Quercitrin)             | 14.83 | 446.7/299.7<br>446.7/270.7 | -65<br>-65 | -9<br>-9       | -18<br>-18     | -30<br>-40 |
| Apigenin 7-O-glucoside                               | 14.91 | 430.7/267.7<br>430.7/116.9 | -70<br>-70 | -9<br>-9       | -20<br>-20     | -38<br>-84 |
| Naringenin 7-O-glucoside                             | 15.12 | 432.7/270.8<br>432.7/118.9 | -40<br>-40 | -8.5<br>-8.5   | -20<br>-20     | -22<br>-64 |
| Afzelin (Kaempferol 3-<br>rhamnoside)                | 15.9  | 431.1/284.9<br>431.1/254.9 | -25<br>-25 | -10<br>-10     | -27.6<br>-27.6 | -30<br>-30 |
| Tiliroside                                           | 17.39 | 592.8/284.8<br>592.8/254.7 | -70<br>-70 | -7.5<br>-7.5   | -24<br>-24     | -38<br>-56 |

**Table S2.** Analytical parameters used for quantitative determination of phenolic acids and flavonoids detected in samples.

| Compound                      | LOD<br>[ng/mL] | LOQ<br>[ng/mL] | R <sup>2</sup> | Linearity range<br>[ng/mL] |
|-------------------------------|----------------|----------------|----------------|----------------------------|
| <b>Phenolic acids</b>         |                |                |                |                            |
| Gallic acid                   | 900            | 1600           | 0.9988         | 1600-16000                 |
| 3-Caffeoylquinic acid         | 50             | 150            | 0.9992         | 150-15000                  |
| Protocatechuic acid           | 200            | 400            | 0.9988         | 1890-18900                 |
| 5-Caffeoylquinic acid         | 75             | 180            | 0.9991         | 180-18000                  |
| 4-Caffeoylquinic acid         | 60             | 120            | 0.9990         | 150-15000                  |
| Caffeic acid                  | 195            | 389            | 0.9991         | 389-19500                  |
| Syringic acid                 | 500            | 732            | 0.9993         | 732-18300                  |
| <b>Flavonoid aglycones</b>    |                |                |                |                            |
| Catechin                      | 250            | 330            | 0.9982         | 330-6600                   |
| Luteolin                      | 6              | 16             | 0.9974         | 33-1650                    |
| Eriodictyol                   | 33             | 66             | 0.9984         | 66-6600                    |
| Quercetin                     | 66             | 132            | 0.9977         | 132-6600                   |
| Apigenin                      | 15             | 22             | 0.9979         | 89-4470                    |
| Isorhamnetin                  | 300            | 480            | 0.9993         | 850-5100                   |
| Sakuranetin                   | 70             | 140            | 0.9991         | 140-6200                   |
| <b>Flavonoid glycosides</b>   |                |                |                |                            |
| Eleutheroside E               | 275            | 550            | 0.9989         | 1000-20000                 |
| Luteolin 3',7'-diglucoside    | 250            | 500            | 0.9990         | 1250-25000                 |
| Rutin                         | 150            | 300            | 0.9983         | 750-15000                  |
| Hyperoside                    | 160            | 250            | 0.9983         | 500-25000                  |
| Luteoloside                   | 50             | 100            | 0.9980         | 250-25000                  |
| Isoquercetin                  | 160            | 250            | 0.9988         | 500-50000                  |
| Eriodictyol-7-glucopyranoside | 150            | 300            | 0.9991         | 600-24000                  |
| Nicotiflorin                  | 70             | 140            | 0.9993         | 140-60000                  |

|                                   |     |     |        |            |
|-----------------------------------|-----|-----|--------|------------|
| Narcissoside                      | 75  | 150 | 0.9989 | 200-25000  |
| Astragalin                        | 100 | 250 | 0.9990 | 750-25000  |
| Isorhamnetin-3-glucoside          | 100 | 225 | 0.9986 | 750-35000  |
| Quercitrin                        | 50  | 100 | 0.9986 | 1000-25000 |
| Apigenin 7-glucoside              | 100 | 250 | 0.9989 | 750-25000  |
| Naringenin 7- <i>O</i> -glucoside | 100 | 167 | 0.9987 | 250-25000  |
| Afzelin                           | 10  | 20  | 0.9973 | 30-6000    |
